# Supplementary material for: Comparison of the Molecular Properties of Euglobals Differing by the Mutual Positions of the Two R–C=O Groups (R = H and CH2CH(CH3)2): A Computational Study
Source: MDPI journal article supplement (doi:10.3390/chemistry5040144), 2023-10-12
Supplement: s1 [file s1]

## Figure S1

### Optimised geometries of the calculated conformers of the euglobals considered in this work.

DFT/B3LYP/6-31+G(d,p) results *in vacuo*.

Corresponding conformers of euglobals differing only by the position of the two acyl groups are shown in a parallel way (in the same row), to facilitate comparisons, whenever corresponding conformers exist. For each pair, the conformers of the  $\epsilon$ -isomer are shown in order of increasing relative energy; the conformers of the  $\zeta$ -isomer are shown in a way that attempts to balance their increasing relative energies and the matching with the conformers of the  $\epsilon$ -isomer shown on the same row. Corresponding conformers are frequent for low energy conformers (conformers with two intramolecular hydrogen bonds) and less frequent for conformers with only one intramolecular hydrogen bond. When a matching conformer was not obtained for one of the two molecules of a pair, the space corresponding to it may remain blank, if this is compatible with the overall set-up of the given table.

The meanings of the symbols used in the acronyms denoting the conformers are listed in table 2.

#### a) Calculated conformers of euglobal IIC (M1- $\epsilon$ ) and euglobal T1 (M1- $\zeta$ )

| conformers of the M1- $\epsilon$ molecule                                                                        |                                                                                                                  | conformers of the M1- $\zeta$ molecule                                                                         |                                                                                                                 |
|------------------------------------------------------------------------------------------------------------------|------------------------------------------------------------------------------------------------------------------|----------------------------------------------------------------------------------------------------------------|-----------------------------------------------------------------------------------------------------------------|
| 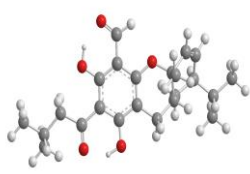<br>M1- $\epsilon$ -a-b-m-w-e  | <br>M1- $\epsilon$ -a-b-m-w-d  | <br>M1- $\zeta$ -a-b-m-w-e  | <br>M1- $\zeta$ -a-b-m-w-d  |
| <br>M1- $\epsilon$ -a-b-m-w-g | <br>M1- $\epsilon$ -a-b-m-w-f | <br>M1- $\zeta$ -a-b-m-w-g | <br>M1- $\zeta$ -a-b-m-w-f |
| <br>M1- $\epsilon$ -a-b-m-w-i | <br>M1- $\epsilon$ -a-b-m-w-h | <br>M1- $\zeta$ -a-b-m-w-i | <br>M1- $\zeta$ -a-b-m-w-h |
|                                                                                                                  |                                                                                                                  |                                                                                                                |                                                                                                                 |

|                                                                                                                                                                                                                     |                                                                                                                                                                                                                    |
|---------------------------------------------------------------------------------------------------------------------------------------------------------------------------------------------------------------------|--------------------------------------------------------------------------------------------------------------------------------------------------------------------------------------------------------------------|
| 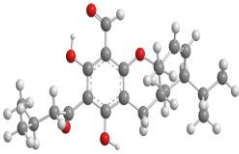 <p>M1-ε-a-m-r-t-e</p>                                                                                                             |  <p>M1-ζ-a-q-r-e</p>  <p>M1-ζ-c-r-z-e</p>     |
|                                                                                                                                                                                                                     |  <p>M1-ζ-a-p-r-e</p>  <p>M1-ζ-a-w-k-e</p>     |
|  <p>M1-ε-b-w-x-u-e</p>                                                                                                             |                                                                                                                                                                                                                    |
|  <p>M1-ε-c-n-r-x-e</p>  <p>M1-ε-c-n-w-x-e</p> |  <p>M1-ζ-c-p-r-z-e</p>                                                                                                         |
|  <p>M1-ε-b-m-w-y-e</p>  <p>M1-ε-b-n-w-x-e</p> |                                                                                                                                                                                                                    |
|  <p>M1-ε-c-m-w-y-e</p>  <p>M1-ε-r-t-x-u-e</p> |  <p>M1-ζ-c-w-x-e</p>  <p>M1-ζ-r-j-z-e</p> |

**b) Calculated conformers of euglobal G2 (M2- $\epsilon$ ) and euglobal G1 (M2- $\zeta$ )**

| conformers of the M2- $\epsilon$ molecule                                                                                                                                                                                                                 | conformers of the M2- $\zeta$ molecule                                                                                                                                                                                                             |
|-----------------------------------------------------------------------------------------------------------------------------------------------------------------------------------------------------------------------------------------------------------|----------------------------------------------------------------------------------------------------------------------------------------------------------------------------------------------------------------------------------------------------|
| 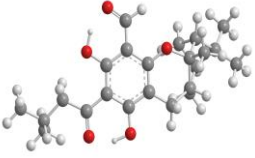  <p>M2-<math>\epsilon</math>-a-b-m-w-e      M2-<math>\epsilon</math>-a-b-m-w-g</p>     |  <p>M2-<math>\zeta</math>-a-b-q-w-e</p>                                                                                                                          |
|   <p>M2-<math>\epsilon</math>-a-b-m-w-d      M2-<math>\epsilon</math>-a-b-m-w-f</p>     |   <p>M2-<math>\zeta</math>-a-b-q-w-d      M2-<math>\zeta</math>-a-b-q-w-f</p> |
|   <p>M2-<math>\epsilon</math>-a-b-m-w-h      M2-<math>\epsilon</math>-a-b-m-w-i</p> |  <p>M2-<math>\zeta</math>-a-b-q-w-i</p>                                                                                                                        |
|   <p>M2-<math>\epsilon</math>-a-m-r-z-e      M2-<math>\epsilon</math>-b-w-x-u-e</p> |  <p>M2-<math>\zeta</math>-a-p-r-k-e</p>                                                                                                                        |
|                                                                                                                                                                                                                                                           |  <p>M2-<math>\zeta</math>-a-q-r-j-e</p>                                                                                                                        |
|                                                                                                                                                                                                                                                           |                                                                                                                                                                                                                                                    |

|                                                                                     |                                                                                      |                                                                                     |                                                                                     |
|-------------------------------------------------------------------------------------|--------------------------------------------------------------------------------------|-------------------------------------------------------------------------------------|-------------------------------------------------------------------------------------|
| 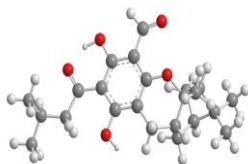   |     |   |  |
| M2-ε-c-n-r-z-e                                                                      | M2-ε-a-m-w-t-e                                                                       | M2-ζ-c-p-r-z-e                                                                      | M2-ζ-a-w-k-e                                                                        |
|    |     |  |                                                                                     |
| M2-ε-b-w-e                                                                          | M2-ε-c-n-w-x-e                                                                       | M2-ζ-c-w-v-e                                                                        |                                                                                     |
|                                                                                     |                                                                                      |   |                                                                                     |
|                                                                                     |                                                                                      | M2-ζ-c-w-z-e                                                                        |                                                                                     |
|  |                                                                                      |                                                                                     |                                                                                     |
| M2-ε-b-n-w-x-e                                                                      |                                                                                      |                                                                                     |                                                                                     |
|  |   |                                                                                     |                                                                                     |
| M2-ε-c-m-r-y-e                                                                      | M2-ε-c-m-w-y-e                                                                       |                                                                                     |                                                                                     |
|  |  |                                                                                     |                                                                                     |
| M2-ε-r-t-x-u-e                                                                      | M2-ζ-r-j-z-e                                                                         |                                                                                     |                                                                                     |

c)      **Calculated conformers of euglobal G3 (M3- $\epsilon$ ) and euglobal G4 (M3- $\zeta$ )**

| conformers of the M3- $\epsilon$ molecule                                                                                                                                                                                         | conformers of the M3- $\zeta$ molecule                                                                                                                                                                                       |
|-----------------------------------------------------------------------------------------------------------------------------------------------------------------------------------------------------------------------------------|------------------------------------------------------------------------------------------------------------------------------------------------------------------------------------------------------------------------------|
| 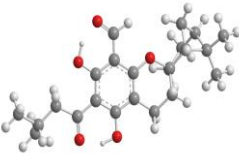<br>M3- $\epsilon$ -a-b-m-w-e <br>M3- $\epsilon$ -a-b-m-w-g     | <br>M3- $\zeta$ -a-b-q-w-e <br>M3- $\zeta$ -a-b-q-w-g   |
| <br>M3- $\epsilon$ -a-b-m-w-d <br>M3- $\epsilon$ -a-b-m-w-f     | <br>M3- $\zeta$ -a-b-q-w-d <br>M3- $\zeta$ -a-b-q-w-f   |
| <br>M3- $\epsilon$ -a-b-m-w-h <br>M3- $\epsilon$ -a-b-m-w-i | <br>M3- $\zeta$ -a-b-q-w-h                                                                                                               |
| <br>M3- $\epsilon$ -a-m-r-s-e                                                                                                                  | <br>M3- $\zeta$ -a-q-r-j-e                                                                                                               |
|                                                                                                                                                                                                                                   | <br>M3- $\zeta$ -a-p-r-k-e <br>M3- $\zeta$ -a-w-k-e |
|                                                                                                                                                                                                                                   |                                                                                                                                                                                                                              |

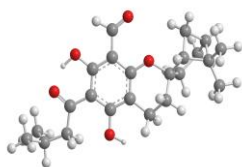

M3-ε-c-n-r-e

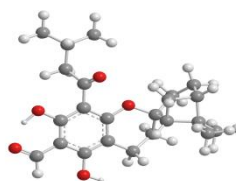

M3-ζ-c-p-r-v-e

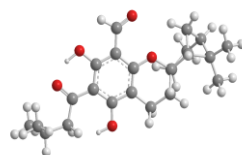

M3-ε-c-n-w-e

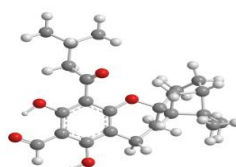

M3-ζ-c-w-v-e

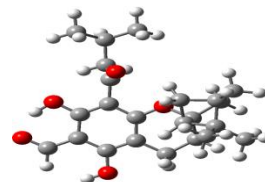

M3-ζ-c-w-v-f

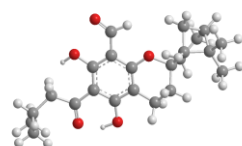

M3-ε-b-m-w-e

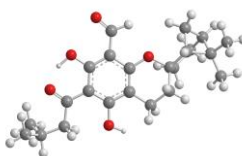

M3-ε-c-m-r-e

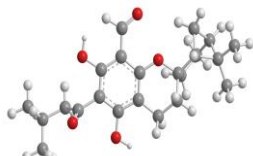

M3-ε-r-t-x-u-e

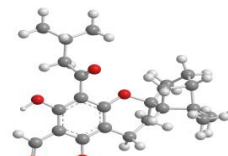

M3-ζ-r-j-v-e

**d) Calculated conformers of euglobal G5 (M4- $\epsilon$ ) and a model molecule with reversed positions of the two acyl groups (M4\*- $\zeta$ )**

| conformers of the M4- $\epsilon$ molecule                                                                        | conformers of the M4*- $\zeta$ molecule                                                                         |
|------------------------------------------------------------------------------------------------------------------|-----------------------------------------------------------------------------------------------------------------|
| 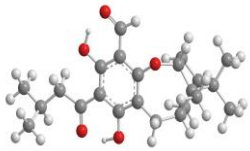<br>M4- $\epsilon$ -a-b-m-w-e   | <br>M4*- $\zeta$ -a-b-q-w-e   |
| <br>M4- $\epsilon$ -a-b-m-w-g   | <br>M4*- $\zeta$ -a-b-q-w-g  |
| <br>M4- $\epsilon$ -a-b-m-w-d   | <br>M4*- $\zeta$ -a-b-q-w-d   |
| <br>M4- $\epsilon$ -a-b-m-w-f   | <br>M4*- $\zeta$ -a-b-q-w-f  |
| <br>M4- $\epsilon$ -a-b-m-w-h | <br>M4*- $\zeta$ -a-b-q-w-h |
| <br>M4- $\epsilon$ -a-b-m-w-i |                                                                                                                 |
| <br>M4- $\epsilon$ -a-m-r-t-e | <br>M4*- $\zeta$ -a-m-r-s-e |
|                                                                                                                  | <br>M4*- $\zeta$ -a-p-r-k-e |
|                                                                                                                  |                                                                                                                 |



|                                                                                                                                                                                                                     |                                                                                                                                                                                                                        |
|---------------------------------------------------------------------------------------------------------------------------------------------------------------------------------------------------------------------|------------------------------------------------------------------------------------------------------------------------------------------------------------------------------------------------------------------------|
| 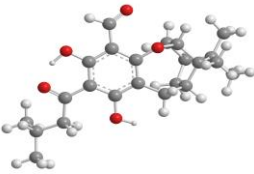 <p>M4-ε-c-n-r-x-e</p>                                                                                                             |  <p>M4*-ζ-c-p-r-v-e</p>                                                                                                              |
|  <p>M4-ε-b-w-x-u-e</p>  <p>M4-ε-a-m-w-k-e</p>     |  <p>M4*-ζ-b-q-w-v-u-e</p>  <p>M4*-ζ-a-w-k-e</p>   |
|  <p>M4-ε-c-n-r-x-g</p>  <p>M4-ε-b-n-w-x-e</p>     |                                                                                                                                                                                                                        |
|  <p>M4-ε-c-m-r-y-e</p>  <p>M4-ε-c-n-w-x-e</p> |  <p>M4*-ζ-c-p-r-z-e</p>  <p>M4*-ζ-c-w-z-e</p> |
|  <p>M4-ε-b-m-w-e</p>  <p>M4-ε-b-n-w-e</p>     |  <p>M4*-ζ-b-w-v-e</p>                                                                                                              |
|  <p>M4-ε-c-m-w-y-e</p>  <p>M4-ε-m-r-t-e</p>   |                                                                                                                                                                                                                        |



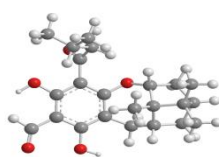

M4\*-ζ-r-j-z-e

e)      **Calculated conformers of euglobal G6 (M5- $\epsilon$ ) and euglobal G7 (M5- $\zeta$ )**

| conformers of the M5- $\epsilon$ molecule                                                                                                                                                                                         | conformers of the M5- $\zeta$ molecule                                                                                                                                                                                       |
|-----------------------------------------------------------------------------------------------------------------------------------------------------------------------------------------------------------------------------------|------------------------------------------------------------------------------------------------------------------------------------------------------------------------------------------------------------------------------|
| 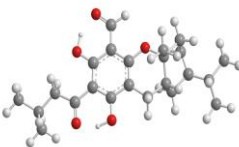<br>M5- $\epsilon$ -a-b-m-w-e <br>M5- $\epsilon$ -a-b-m-w-g     | <br>M5- $\zeta$ -a-b-q-w-e <br>M5- $\zeta$ -a-b-q-w-g   |
| <br>M5- $\epsilon$ -a-b-m-w-d <br>M5- $\epsilon$ -a-b-m-w-f     | <br>M5- $\zeta$ -a-b-q-w-d <br>M5- $\zeta$ -a-b-q-w-f   |
| <br>M5- $\epsilon$ -a-b-m-w-i <br>M5- $\epsilon$ -a-b-m-w-h |                                                                                                                                                                                                                              |
| <br>M5- $\epsilon$ -b-w-x-u-e <br>M5- $\epsilon$ -a-m-r-s-e | <br>M5- $\zeta$ -a-q-r-j-e                                                                                                              |
| <br>M5- $\epsilon$ -a-m-r-t-e                                                                                                                  | <br>M5- $\zeta$ -a-p-r-e <br>M5- $\zeta$ -a-p-r-k-e |
|                                                                                                                                                                                                                                   |                                                                                                                                                                                                                              |

|                                                                                                                                                                                                             |                                                                                                                                                                                                              |
|-------------------------------------------------------------------------------------------------------------------------------------------------------------------------------------------------------------|--------------------------------------------------------------------------------------------------------------------------------------------------------------------------------------------------------------|
|                                                                                                                                                                                                             | 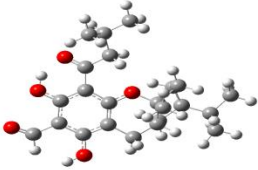<br>M5-ζ-a-w-k-e <br>M5-ζ-q-r-j-v-u-e   |
| <br>M5-ε-c-n-r-x-e                                                                                                         |                                                                                                                                                                                                              |
| <br>M5-ε-c-n-w-x-e <br>M5-ε-b-m-w-y-e     | <br>M5-ζ-c-w-v-e <br>M5-ζ-b-w-v-e       |
| <br>M5-ε-c-n-r-x-e <br>M5-ε-c-n-w-x-e | <br>M5-ζ-c-p-r-v-e <br>M5-ζ-c-w-z-e |
| <br>M5-ε-c-m-r-y-e                                                                                                       |                                                                                                                                                                                                              |
| <br>M5-ε-r-s-x-u-e                                                                                                       | <br>M5-ζ-r-j-v-e <br>M5-ζ-r-j-z-e   |

**f) Calculated conformers of euglobal G8 (M6- $\epsilon$ ) and a model molecule with reversed positions of the two acyl groups (M6\*- $\zeta$ )**

| conformers of the M6- $\epsilon$ molecule                                                                                                                                                                                         | conformers of the M6- $\zeta$ molecule                                                                                                                                                                                           |
|-----------------------------------------------------------------------------------------------------------------------------------------------------------------------------------------------------------------------------------|----------------------------------------------------------------------------------------------------------------------------------------------------------------------------------------------------------------------------------|
| 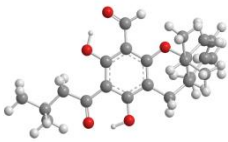<br>M6- $\epsilon$ -a-b-m-w-e <br>M6- $\epsilon$ -a-b-m-w-d     | <br>M6- $\zeta$ -a-b-q-w-e <br>M6- $\zeta$ -a-b-q-w-d       |
| <br>M6- $\epsilon$ -a-b-m-w-g <br>M6- $\epsilon$ -a-b-m-w-f     | <br>M6- $\zeta$ -a-b-q-w-g                                                                                                                     |
| <br>M6- $\epsilon$ -a-b-m-w-h <br>M6- $\epsilon$ -a-b-m-w-i | <br>M6- $\zeta$ -a-b-q-w-h <br>M6- $\zeta$ -a-b-q-w-i   |
| <br>M6- $\epsilon$ -c-n-r-x-e <br>M6- $\epsilon$ -b-m-w-y-e | <br>M6- $\zeta$ -c-p-r-v-e <br>M6- $\zeta$ -b-q-w-v-u-e |
| <br>M6- $\epsilon$ -c-n-w-x-e <br>M6- $\epsilon$ -a-m-r-s-e | <br>M6- $\zeta$ -a-q-r-j-e                                                                                                                  |
|                                                                                                                                                                                                                                   |                                                                                                                                                                                                                                  |

|                                                                                                         |                                                                                                          |                                                                                                             |
|---------------------------------------------------------------------------------------------------------|----------------------------------------------------------------------------------------------------------|-------------------------------------------------------------------------------------------------------------|
| 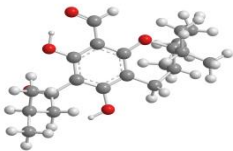 <p>M6-ε-a-m-w-t-e</p> |  <p>M6-ε-c-m-r-y-e</p>  |                                                                                                             |
|  <p>M6-ε-a-m-r-t-e</p> |  <p>M6-ζ-a-p-r-k-e</p> |  <p>M6-ζ-p-r-k-z-u-e</p> |
|  <p>M6-ε-r-t-x-u-e</p> |  <p>M6-ζ-r-j-z-e</p>   |                                                                                                             |

**g) Calculated conformers of euglobal G9 (M7- $\epsilon$ ) and euglobal G10 (M7- $\zeta$ )**

| conformers of the M7- $\epsilon$ molecule                                                                                                                                                                                         | conformers of the M7- $\zeta$ molecule                                                                                                                                                                                         |
|-----------------------------------------------------------------------------------------------------------------------------------------------------------------------------------------------------------------------------------|--------------------------------------------------------------------------------------------------------------------------------------------------------------------------------------------------------------------------------|
| 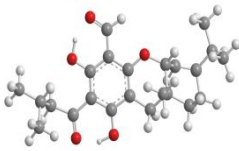<br>M7- $\epsilon$ -a-b-m-w-e <br>M7- $\epsilon$ -a-b-m-w-g     | <br>M7- $\zeta$ -a-b-q-w-e <br>M7- $\zeta$ -a-b-q-w-g     |
| <br>M7- $\epsilon$ -a-b-m-w-d <br>M7- $\epsilon$ -a-b-m-w-f     | <br>M7- $\zeta$ -a-b-q-w-d <br>M7- $\zeta$ -a-b-q-w-f     |
| <br>M7- $\epsilon$ -a-b-m-w-i <br>M7- $\epsilon$ -a-b-m-w-h | <br>M7- $\zeta$ -a-b-q-w-i <br>M7- $\zeta$ -a-b-q-w-h |
| <br>M7- $\epsilon$ -a-m-r-t-e                                                                                                                  | <br>M7- $\zeta$ -a-p-k-r-e <br>M7- $\zeta$ -a-q-r-j-e |
| <br>M7- $\epsilon$ -b-w-x-e <br>M7- $\epsilon$ -a-m-w-s-e   | <br>M7- $\zeta$ -a-w-k-e                                                                                                                  |
|                                                                                                                                                                                                                                   |                                                                                                                                                                                                                                |

|                                                                                                                                                                                                                 |                                                                                                                                                                                                                             |
|-----------------------------------------------------------------------------------------------------------------------------------------------------------------------------------------------------------------|-----------------------------------------------------------------------------------------------------------------------------------------------------------------------------------------------------------------------------|
| 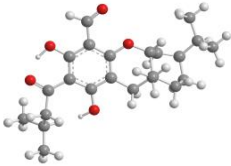 <p>M7-ε- c-n-w-x-e</p>                                                                                                        |  <p>M7-ζ-c-w-z-e</p>  <p>M7-ζ-b-q-w-z-u-e</p>          |
|  <p>M7-ε-b-m-w-y-e</p>  <p>M7-ε-b-n-w-x-e</p> |                                                                                                                                                                                                                             |
|  <p>M7-ε-c-m-r-y-e</p>                                                                                                        | <p>\</p>  <p>M7-ζ-c-p-r-z-e</p>  <p>M7-ζ-c-w-v-e</p> |
|                                                                                                                                                                                                                 |  <p>M7-ζ-c-p-r-v-e</p>                                                                                                                  |
|  <p>M7-ε-r-t-x-u-e</p>                                                                                                       |  <p>M7-ζ-w-k-v-u-e</p>                                                                                                                  |



**h) Calculated conformers of euglobal G11 (M8- $\epsilon$ ) and a model molecule with reversed positions of the two acyl groups (M8\*- $\zeta$ )**

| conformers of the M8- $\epsilon$ molecule                                           |                                                                                     | conformers of the M8*- $\zeta$ molecule                                              |                                                                                       |
|-------------------------------------------------------------------------------------|-------------------------------------------------------------------------------------|--------------------------------------------------------------------------------------|---------------------------------------------------------------------------------------|
| 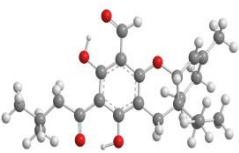   |    |    |    |
| M8- $\epsilon$ -a-b-m-w-e                                                           | M8- $\epsilon$ -a-b-m-w-d                                                           | M8*- $\zeta$ -a-b-q-w-e                                                              | M8*- $\zeta$ -a-b-q-w-d                                                               |
|    |    |    |    |
| M8- $\epsilon$ -a-b-m-w-g                                                           | M8- $\epsilon$ -a-b-m-w-f                                                           | M8*- $\zeta$ -a-b-q-w-g                                                              | M8*- $\zeta$ -a-b-q-w-f                                                               |
|  |  |  |  |
| M8- $\epsilon$ -a-b-m-w-i                                                           | M8- $\epsilon$ -a-b-m-w-h                                                           | M8*- $\zeta$ -a-b-q-w-i                                                              | M8*- $\zeta$ -a-b-q-w-h                                                               |
|  |  |  |  |
| M8- $\epsilon$ -a-m-r-t-e                                                           | M8- $\epsilon$ -a-m-r-s-e                                                           | M8*- $\zeta$ -a-q-r-e                                                                | M8*- $\zeta$ -a-p-r-k-e                                                               |
|  |  |                                                                                      |                                                                                       |
| M8- $\epsilon$ -b-w-x-u-e                                                           | M8- $\epsilon$ -c-n-r-x-e                                                           |                                                                                      |                                                                                       |
|                                                                                     |                                                                                     |                                                                                      |                                                                                       |

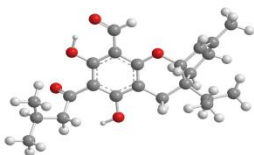

M8-ε-a-m-w-t-e

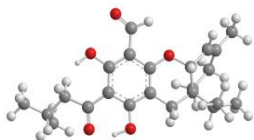

M8-ε-b-m-w-y-e

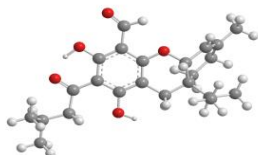

M8-ε-c-m-r-y-e

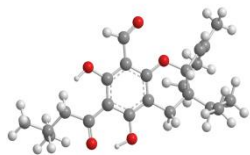

M8-ε-b-n-w-x-e

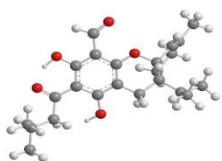

M8-ε-c-n-w-x-e

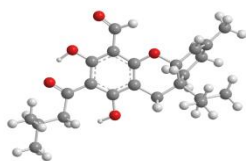

M8-ε-c-m-w-y-e

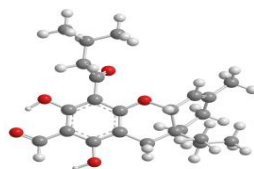

M8\*-ζ-c-w-z-e

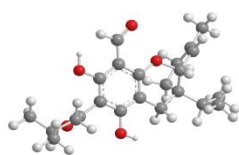

M8-ε-r-t-x-u-e

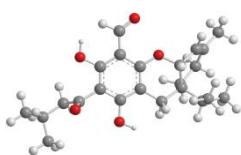

M8-ε-r-s-x-u-e

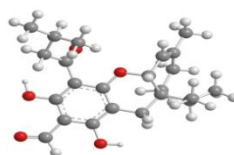

M8\*-ζ-p-r-k-z-u-e

i) **Calculated conformers of a model molecule with reversed positions of the two acyl groups with respect to euglobal G12 (M9\*-ε) and euglobal G12 (M9-ζ)**

| conformers of the M9*-ε molecule                                                                                                                                                                              | conformers of the M9-ζ molecule                                                                                                                                                                              |
|---------------------------------------------------------------------------------------------------------------------------------------------------------------------------------------------------------------|--------------------------------------------------------------------------------------------------------------------------------------------------------------------------------------------------------------|
| 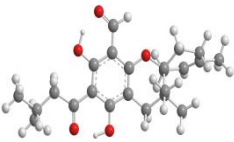<br>M9*-ε-a-b-m-w-e <br>M9*-ε-a-b-m-w-g     | <br>M9-ζ-a-b-q-w-e <br>M9-ζ-a-b-q-w-g   |
| <br>M9*-ε-a-b-m-w-d <br>M9*-ε-a-b-m-w-f     | <br>M9-ζ-a-b-q-w-d <br>M9-ζ-a-b-q-w-f   |
| <br>M9*-ε-a-b-m-w-h <br>M9*-ε-a-b-m-w-i |                                                                                                                                                                                                              |
| <br>M9*-ε-a-m-r-s-e                                                                                                        | <br>M9-ζ-a-p-r-k-e <br>M9-ζ-a-q-r-e |
|                                                                                                                                                                                                               | <br>M9-ζ-a-w-k-e                                                                                                         |
|                                                                                                                                                                                                               |                                                                                                                                                                                                              |

|                                                                                                                                                                                                                     |                                                                                                                                                                                                                    |
|---------------------------------------------------------------------------------------------------------------------------------------------------------------------------------------------------------------------|--------------------------------------------------------------------------------------------------------------------------------------------------------------------------------------------------------------------|
| 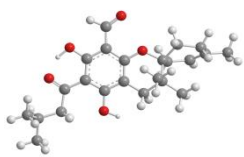 <p>M9*-ε-c-n-r-x-e</p>                                                                                                            |  <p>M9-ζ-c-p-r-z-e</p>                                                                                                           |
|  <p>M9*-ε-b-w-x-u-e</p>  <p>M9*-ε-b-n-w-x-e</p>   |  <p>M9-ζ-b-q-w-v-u-e</p>  <p>M9-ζ-b-w-v-e</p> |
|  <p>M9*-ε-c-n-w-x-e</p>  <p>M9*-ε-b-m-w-y-e</p>   |  <p>M9-ζ-c-w-z-e</p>                                                                                                             |
|  <p>M9*-ε-c-m-r-y-e</p>                                                                                                          |  <p>M9-ζ-c-p-r-v-e</p>                                                                                                         |
|  <p>M9*-ε-c-m-w-e</p>  <p>M9*-ε-r-t-x-u-e</p> |  <p>M9-ζ-c-w-v-e</p>  <p>M9-ζ-r-j-v-e</p> |
|                                                                                                                                                                                                                     |  <p>M9-ζ-r-j-z-e</p>                                                                                                           |

j) **Calculated conformers of euglobal VII (M10- $\epsilon$ ) and a model molecule with reversed positions of the two acyl groups (M10\*- $\zeta$ )**

| conformers of the M10- $\epsilon$ molecule                                                                                                                                                                                          | conformers of the M10*- $\zeta$ molecule                                                                                                                                                                                             |
|-------------------------------------------------------------------------------------------------------------------------------------------------------------------------------------------------------------------------------------|--------------------------------------------------------------------------------------------------------------------------------------------------------------------------------------------------------------------------------------|
| 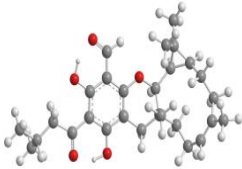<br>M10- $\epsilon$ -a-b-m-w-e <br>M10- $\epsilon$ -a-b-m-w-d     | <br>M10*- $\zeta$ -a-b-q-w-e <br>M10*- $\zeta$ -a-b-q-w-d       |
| <br>M10- $\epsilon$ -a-b-m-w-g <br>M10- $\epsilon$ -a-b-m-w-f     | <br>M10*- $\zeta$ -a-b-q-w-g <br>M10*- $\zeta$ -a-b-q-w-f       |
| <br>M10- $\epsilon$ -a-b-m-w-i <br>M10- $\epsilon$ -a-b-m-w-h |                                                                                                                                                                                                                                      |
| <br>M10- $\epsilon$ -c-n-r-x-e <br>M10- $\epsilon$ -b-w-x-e   | <br>M10*- $\zeta$ -c-p-r-z-e <br>M10*- $\zeta$ -b-q-w-z-u-e |
| <br>M10- $\epsilon$ -c-n-w-x-e <br>M10- $\epsilon$ -b-n-w-x-e |                                                                                                                                                                                                                                      |
|                                                                                                                                                                                                                                     |                                                                                                                                                                                                                                      |

|                                                                                                          |                                                                                                                                                                                                                    |
|----------------------------------------------------------------------------------------------------------|--------------------------------------------------------------------------------------------------------------------------------------------------------------------------------------------------------------------|
|                                                                                                          | 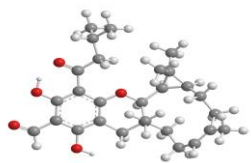  <p>M10*-ζ-a-p-r-e</p> <p>M10*-ζ-a-q-r-e</p> |
|  <p>M10-ε-r-s-x-u-e</p> |  <p>M10*-ζ-w-z-k-u-e</p>                                                                                                         |
