# Supplementary material for: Comparison of the Molecular Properties of Euglobals Differing by the Mutual Positions of the Two R–C=O Groups (R = H and CH2CH(CH3)2): A Computational Study
Source: MDPI journal article supplement (doi:10.3390/chemistry5040144), 2023-10-12
Supplement: s1 [file s1]

**Figure S 10**

**Shapes of the HOMO and LUMO frontier orbitals of the calculated conformers of the euglobal molecules considered in this work.**

The images are organised with the same criteria as the conformers' geometries in figure S1.

**a) Calculated conformers of euglobal IIC (M1- $\epsilon$ ) and euglobal T1 (M1- $\zeta$ )**

| conformers of the M1- $\epsilon$ molecule                                           |                                                                                     | conformers of the M1- $\zeta$ molecule                                               |                                                                                       |
|-------------------------------------------------------------------------------------|-------------------------------------------------------------------------------------|--------------------------------------------------------------------------------------|---------------------------------------------------------------------------------------|
| HOMO                                                                                | LUMO                                                                                | HOMO                                                                                 | LUMO                                                                                  |
| 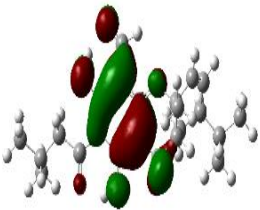   |    |    |    |
| M1- $\epsilon$ -a-b-m-w-e                                                           |                                                                                     | M1- $\zeta$ -a-b-m-w-e                                                               |                                                                                       |
|  |  |  |  |
| M1- $\epsilon$ -a-b-m-w-d                                                           |                                                                                     | M1- $\zeta$ -a-b-m-w-d                                                               |                                                                                       |
|  |  |  |  |
| M1- $\epsilon$ -a-b-m-w-g                                                           |                                                                                     | M1- $\zeta$ -a-b-m-w-g                                                               |                                                                                       |

|                                                                                     |                                                                                     |                                                                                      |                                                                                       |
|-------------------------------------------------------------------------------------|-------------------------------------------------------------------------------------|--------------------------------------------------------------------------------------|---------------------------------------------------------------------------------------|
| 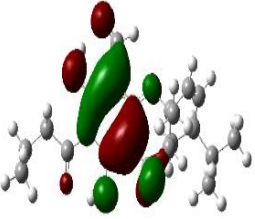   |    |    |    |
| M1- $\epsilon$ -a-b-m-w-f                                                           |                                                                                     | M1- $\zeta$ -a-b-m-w-f                                                               |                                                                                       |
|    |    |    |    |
| M1- $\epsilon$ -a-b-m-w-i                                                           |                                                                                     | M1- $\zeta$ -a-b-m-w-i                                                               |                                                                                       |
|   |   |   |   |
| M1- $\epsilon$ -a-b-m-w-h                                                           |                                                                                     | M1- $\zeta$ -a-b-m-w-h                                                               |                                                                                       |
|  |  |  |  |
| M1- $\epsilon$ -a-m-r-t-e                                                           |                                                                                     | M1- $\zeta$ -a-q-r-e                                                                 |                                                                                       |
|                                                                                     |                                                                                     |  |  |

|                                                                                     |                                                                                     |                                                                                      |                                                                                       |
|-------------------------------------------------------------------------------------|-------------------------------------------------------------------------------------|--------------------------------------------------------------------------------------|---------------------------------------------------------------------------------------|
|                                                                                     |                                                                                     | M1-ζ-a-p-r-e                                                                         |                                                                                       |
|                                                                                     |                                                                                     | 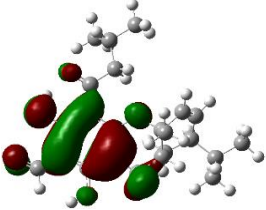   |    |
|                                                                                     |                                                                                     | M1-ζ-a-w-k-e                                                                         |                                                                                       |
|    |    |                                                                                      |                                                                                       |
| M1-ε-b-w-x-u-e                                                                      |                                                                                     |                                                                                      |                                                                                       |
|  |  |  |  |
| M1-ε-c-n-r-x-e                                                                      |                                                                                     | M1-ζ-c-p-r-z-e                                                                       |                                                                                       |
|  |  |                                                                                      |                                                                                       |
| M1-ε-c-n-w-x-e                                                                      |                                                                                     |                                                                                      |                                                                                       |

|                                                                                     |                                                                                     |                                                                                      |                                                                                       |
|-------------------------------------------------------------------------------------|-------------------------------------------------------------------------------------|--------------------------------------------------------------------------------------|---------------------------------------------------------------------------------------|
| 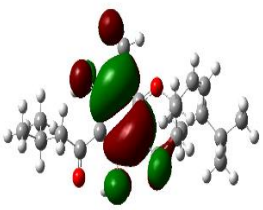   |    |                                                                                      |                                                                                       |
| M1-ε-b-m-w-y-e                                                                      |                                                                                     |                                                                                      |                                                                                       |
|    |    |                                                                                      |                                                                                       |
| M1-ε-b-n-w-x-e                                                                      |                                                                                     |                                                                                      |                                                                                       |
|   |   |   |   |
| M1-ε-c-m-w-y-e                                                                      |                                                                                     | M1-ζ-c-w-x-e                                                                         |                                                                                       |
|  |  |  |  |
| M1-ε-r-t-x-u-e                                                                      |                                                                                     | M1-ζ-r-j-z-e                                                                         |                                                                                       |



b) Calculated conformers of euglobal G2 (M2- $\epsilon$ ) and euglobal G1 (M2- $\zeta$ )

| conformers of the M2- $\epsilon$ molecule                                           |                                                                                     | conformers of the M2- $\zeta$ molecule                                               |                                                                                       |
|-------------------------------------------------------------------------------------|-------------------------------------------------------------------------------------|--------------------------------------------------------------------------------------|---------------------------------------------------------------------------------------|
| HOMO                                                                                | LUMO                                                                                | HOMO                                                                                 | LUMO                                                                                  |
| 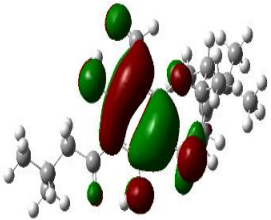   |    |    |    |
| M2- $\epsilon$ -a-b-m-w-e                                                           |                                                                                     | M2- $\zeta$ -a-b-q-w-e                                                               |                                                                                       |
|   |   |                                                                                      |                                                                                       |
| M2- $\epsilon$ -a-b-m-w-g                                                           |                                                                                     |                                                                                      |                                                                                       |
|  |  |  |  |
| M2- $\epsilon$ -a-b-m-w-d                                                           |                                                                                     | M2- $\zeta$ -a-b-q-w-d                                                               |                                                                                       |
|  |  |  |  |
| M2- $\epsilon$ -a-b-m-w-f                                                           |                                                                                     | M2- $\zeta$ -a-b-q-w-f                                                               |                                                                                       |

|                                                                                     |                                                                                     |                                                                                      |                                                                                       |
|-------------------------------------------------------------------------------------|-------------------------------------------------------------------------------------|--------------------------------------------------------------------------------------|---------------------------------------------------------------------------------------|
|                                                                                     |                                                                                     |                                                                                      |                                                                                       |
| 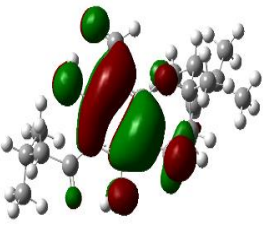   |    |                                                                                      |                                                                                       |
| M2- $\epsilon$ -a-b-m-w-h                                                           |                                                                                     |                                                                                      |                                                                                       |
|    |    |    |    |
| M2- $\epsilon$ -a-b-m-w-i                                                           |                                                                                     | M2- $\zeta$ -a-b-q-w-i                                                               |                                                                                       |
|  |  |  |  |
| M2- $\epsilon$ -a-m-r-z-e                                                           |                                                                                     | M2- $\zeta$ -a-p-r-k-e                                                               |                                                                                       |
|  |  |                                                                                      |                                                                                       |
| M2- $\epsilon$ -b-w-x-u-e                                                           |                                                                                     |                                                                                      |                                                                                       |

|                                                                                     |                                                                                     |                                                                                      |                                                                                       |
|-------------------------------------------------------------------------------------|-------------------------------------------------------------------------------------|--------------------------------------------------------------------------------------|---------------------------------------------------------------------------------------|
|                                                                                     |                                                                                     | 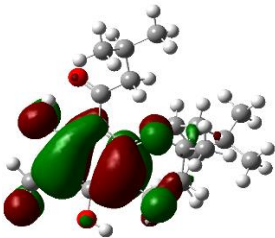   |    |
|                                                                                     |                                                                                     | M2-ζ-a-q-r-j-e                                                                       |                                                                                       |
|    |    |    |    |
| M2-ε-c-n-r-z-e                                                                      |                                                                                     | M2-ζ-c-p-r-z-e                                                                       |                                                                                       |
|   |   |   |   |
| M2-ε-a-m-w-t-e                                                                      |                                                                                     | M2-ζ-a-w-k-e                                                                         |                                                                                       |
|  |  |                                                                                      |                                                                                       |
| M2-ε-a-b-w-e                                                                        |                                                                                     |                                                                                      |                                                                                       |
|  |  |  |  |

|                                                                                     |                                                                                     |                                                                                    |                                                                                     |
|-------------------------------------------------------------------------------------|-------------------------------------------------------------------------------------|------------------------------------------------------------------------------------|-------------------------------------------------------------------------------------|
| M2-ε-c-n-w-x-e                                                                      |                                                                                     | M2-ζ-c-w-v-e                                                                       |                                                                                     |
|                                                                                     |                                                                                     | 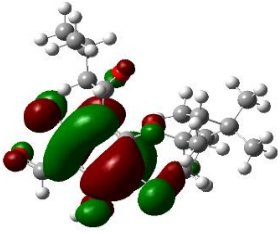 |  |
|                                                                                     |                                                                                     | M2-ζ-c-w-z-e                                                                       |                                                                                     |
|    |    |                                                                                    |                                                                                     |
| M2-ε-b-n-w-x-e                                                                      |                                                                                     |                                                                                    |                                                                                     |
|  |  |                                                                                    |                                                                                     |
| M2-ε-c-m-r-y-e                                                                      |                                                                                     |                                                                                    |                                                                                     |
|  |  |                                                                                    |                                                                                     |
| M2-ε-c-m-w-y-e                                                                      |                                                                                     |                                                                                    |                                                                                     |



|                                                                                   |                                                                                   |                                                                                    |                                                                                     |
|-----------------------------------------------------------------------------------|-----------------------------------------------------------------------------------|------------------------------------------------------------------------------------|-------------------------------------------------------------------------------------|
| 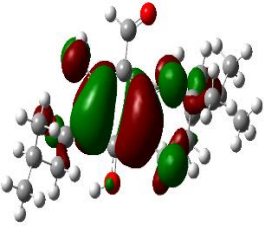 |  |  |  |
| M2-ε-r-t-x-u-e                                                                    | M2-ζ-r-j-z-e                                                                      |                                                                                    |                                                                                     |

c) Calculated conformers of euglobal G3 (M3- $\epsilon$ ) and euglobal G4 (M3- $\zeta$ )

| conformers of the M3- $\epsilon$ molecule                                           |                                                                                     | conformers of the M3- $\zeta$ molecule                                               |                                                                                       |
|-------------------------------------------------------------------------------------|-------------------------------------------------------------------------------------|--------------------------------------------------------------------------------------|---------------------------------------------------------------------------------------|
| HOMO                                                                                | LUMO                                                                                | HOMO                                                                                 | LUMO                                                                                  |
| 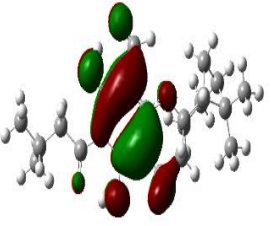   |    |    |    |
| M3- $\epsilon$ -a-b-m-w-e                                                           |                                                                                     | M3- $\zeta$ -a-b-q-w-e                                                               |                                                                                       |
|   |   |   |   |
| M3- $\epsilon$ -a-b-m-w-g                                                           |                                                                                     | M3- $\zeta$ -a-b-q-w-g                                                               |                                                                                       |
|  |  |  |  |
| M3- $\epsilon$ -a-b-m-w-d                                                           |                                                                                     | M3- $\zeta$ -a-b-q-w-d                                                               |                                                                                       |
|  |  |  |  |
| M3- $\epsilon$ -a-b-m-w-f                                                           |                                                                                     | M3- $\zeta$ -a-b-q-w-f                                                               |                                                                                       |

|                                                                                     |                                                                                     |                                                                                      |                                                                                       |
|-------------------------------------------------------------------------------------|-------------------------------------------------------------------------------------|--------------------------------------------------------------------------------------|---------------------------------------------------------------------------------------|
|                                                                                     |                                                                                     |                                                                                      |                                                                                       |
| 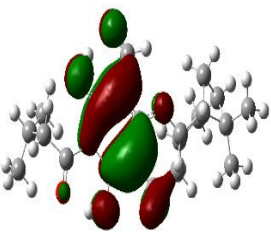   |    |    |    |
| M3-ε-a-b-m-w-h                                                                      |                                                                                     | M3-ζ-a-b-q-w-h                                                                       |                                                                                       |
|    |    |                                                                                      |                                                                                       |
| M3-ε-a-b-m-w-i                                                                      |                                                                                     |                                                                                      |                                                                                       |
|  |  |  |  |
| M3-ε-a-m-r-s-e                                                                      |                                                                                     | M3-ζ-a-q-r-j-e                                                                       |                                                                                       |
|                                                                                     |                                                                                     |  |  |
|                                                                                     |                                                                                     | M3-ζ-a-p-r-k-e                                                                       |                                                                                       |

|                                                                                     |                                                                                     |                                                                                      |                                                                                       |
|-------------------------------------------------------------------------------------|-------------------------------------------------------------------------------------|--------------------------------------------------------------------------------------|---------------------------------------------------------------------------------------|
|                                                                                     |                                                                                     | 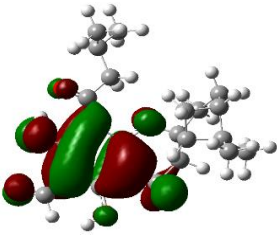   |    |
|                                                                                     |                                                                                     | M3-ζ-a-w-k-e                                                                         |                                                                                       |
|    |    |    |    |
| M3-ε-c-n-r-e                                                                        |                                                                                     | M3-ζ-c-p-r-v-e                                                                       |                                                                                       |
|   |   |   |   |
| M3-ε-c-n-w-e                                                                        |                                                                                     | M3-ζ-c-w-v-e                                                                         |                                                                                       |
|  |  |                                                                                      |                                                                                       |
| M3-ε-b-n-w-e                                                                        |                                                                                     |                                                                                      |                                                                                       |
|                                                                                     |                                                                                     |  |  |

|                                                                                     |                                                                                     |                                                                                      |                                                                                       |
|-------------------------------------------------------------------------------------|-------------------------------------------------------------------------------------|--------------------------------------------------------------------------------------|---------------------------------------------------------------------------------------|
|                                                                                     |                                                                                     | M3-ζ-c-w-v-f                                                                         |                                                                                       |
| 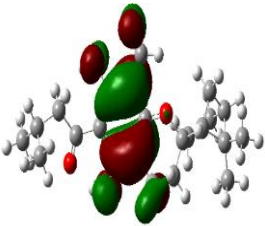   |    |                                                                                      |                                                                                       |
| M3-ε-b-m-w-e                                                                        |                                                                                     |                                                                                      |                                                                                       |
|                                                                                     |                                                                                     |                                                                                      |                                                                                       |
|   |   |                                                                                      |                                                                                       |
| M3-ε-c-m-r-e                                                                        |                                                                                     |                                                                                      |                                                                                       |
|  |  |  |  |
| M3- ε-r-t-x-u-e                                                                     |                                                                                     | M3-ζ-r-j-v-e                                                                         |                                                                                       |



**d) Calculated conformers of euglobal G5 (M4- $\epsilon$ ) and a model molecule with reversed positions of the two acyl groups (M4\*- $\zeta$ )**

| conformers of the M4- $\epsilon$ molecule                                           |                                                                                     | conformers of the M4*- $\zeta$ molecule                                              |                                                                                       |
|-------------------------------------------------------------------------------------|-------------------------------------------------------------------------------------|--------------------------------------------------------------------------------------|---------------------------------------------------------------------------------------|
| HOMO                                                                                | LUMO                                                                                | HOMO                                                                                 | LUMO                                                                                  |
| 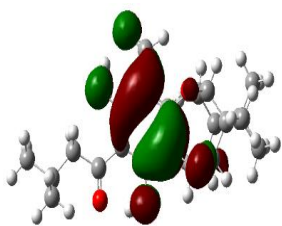   |    |    |    |
| M4- $\epsilon$ -a-b-m-w-e                                                           |                                                                                     | M4*- $\zeta$ -a-b-q-w-e                                                              |                                                                                       |
|   |   |   |   |
| M4- $\epsilon$ -a-b-m-w-g                                                           |                                                                                     | M4*- $\zeta$ -a-b-q-w-g                                                              |                                                                                       |
|  |  |  |  |
| M4- $\epsilon$ -a-b-m-w-d                                                           |                                                                                     | M4*- $\zeta$ -a-b-q-w-d                                                              |                                                                                       |
|  |  |  |  |

|                                                                                     |                                                                                     |                                                                                      |                                                                                       |
|-------------------------------------------------------------------------------------|-------------------------------------------------------------------------------------|--------------------------------------------------------------------------------------|---------------------------------------------------------------------------------------|
| M4-ε-a-b-m-w-f                                                                      |                                                                                     | M4*-ζ-a-b-q-w-f                                                                      |                                                                                       |
| 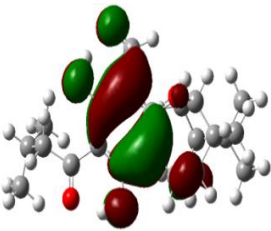   |    |    |    |
| M4-ε-a-b-m-w-h                                                                      |                                                                                     | M4*-ζ-a-b-q-w-h                                                                      |                                                                                       |
|    |    |                                                                                      |                                                                                       |
| M4-ε-a-b-m-w-i                                                                      |                                                                                     |                                                                                      |                                                                                       |
|  |  |  |  |
| M4-ε-a-m-r-t-e                                                                      |                                                                                     | M4*-ζ-a-m-r-s-e                                                                      |                                                                                       |
|                                                                                     |                                                                                     |  |  |
|                                                                                     |                                                                                     | M4*-ζ-a-p-r-k-e                                                                      |                                                                                       |

|                                                                                     |                                                                                     |                                                                                     |                                                                                      |
|-------------------------------------------------------------------------------------|-------------------------------------------------------------------------------------|-------------------------------------------------------------------------------------|--------------------------------------------------------------------------------------|
| 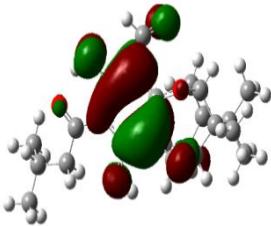   |    |   |   |
| M4-ε-c-n-r-x-e                                                                      |                                                                                     | M4*-ζ-c-p-r-v-e                                                                     |                                                                                      |
|    |    |   |   |
| M4-ε-b-w-x-u-e                                                                      |                                                                                     | M4*-ζ-b-q-w-v-u-e                                                                   |                                                                                      |
|   |   |  |  |
| M4-ε-a-m-w-k-e                                                                      |                                                                                     | M4*-ζ-a-w-k-e                                                                       |                                                                                      |
|  |  |                                                                                     |                                                                                      |
| M4-ε-c-n-r-x-g                                                                      |                                                                                     |                                                                                     |                                                                                      |

|                                                                                     |                                                                                     |                                                                                      |                                                                                       |
|-------------------------------------------------------------------------------------|-------------------------------------------------------------------------------------|--------------------------------------------------------------------------------------|---------------------------------------------------------------------------------------|
| 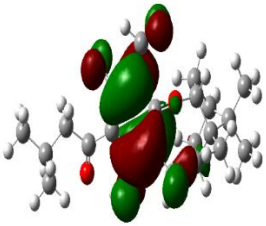   |    |                                                                                      |                                                                                       |
| M4-ε-b-n-w-x-e                                                                      |                                                                                     |                                                                                      |                                                                                       |
|    |    |    |    |
| M4-ε-c-m-r-y-e                                                                      |                                                                                     | M4*-ζ-c-p-r-z-e                                                                      |                                                                                       |
|   |   |   |   |
| M4-ε-c-n-w-x-e                                                                      |                                                                                     | M4*-ζ-c-w-z-e                                                                        |                                                                                       |
|  |  |  |  |
| M4-ε-b-m-w-e                                                                        |                                                                                     | M4*-ζ-b-w-v-e                                                                        |                                                                                       |
|  |  |                                                                                      |                                                                                       |



|                                                                                   |                                                                                   |                                                                                    |                                                                                     |
|-----------------------------------------------------------------------------------|-----------------------------------------------------------------------------------|------------------------------------------------------------------------------------|-------------------------------------------------------------------------------------|
| M4-ε-b-n-w-e                                                                      |                                                                                   |                                                                                    |                                                                                     |
| 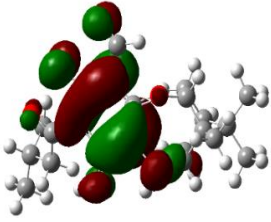 |  |                                                                                    |                                                                                     |
| M4-ε-c-m-w-y-e                                                                    |                                                                                   |                                                                                    |                                                                                     |
|  |  |  |  |
| M4-ε-m-r-t-e                                                                      |                                                                                   | M4*-ζ-r-j-z-e                                                                      |                                                                                     |



e)      **Calculated conformers of euglobal G6 (M5- $\epsilon$ ) and euglobal G7 (M5- $\zeta$ )**

| conformers of the M5- $\epsilon$ molecule                                           |                                                                                     | conformers of the M5- $\zeta$ molecule                                               |                                                                                       |
|-------------------------------------------------------------------------------------|-------------------------------------------------------------------------------------|--------------------------------------------------------------------------------------|---------------------------------------------------------------------------------------|
| HOMO                                                                                | LUMO                                                                                | HOMO                                                                                 | LUMO                                                                                  |
| 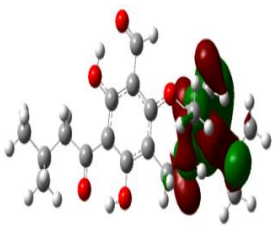   |    |    |    |
| M5- $\epsilon$ -a-b-m-w-e                                                           |                                                                                     | M5- $\zeta$ -a-b-q-w-e                                                               |                                                                                       |
|   |   |   |   |
| M5- $\epsilon$ -a-b-m-w-g                                                           |                                                                                     | M5- $\zeta$ -a-b-q-w-g                                                               |                                                                                       |
|  |  |  |  |
| M5- $\epsilon$ -a-b-m-w-d                                                           |                                                                                     | M5- $\zeta$ -a-b-q-w-d                                                               |                                                                                       |
|  |  |  |  |
| M5- $\epsilon$ -a-b-m-w-f                                                           |                                                                                     | M5- $\zeta$ -a-b-q-w-f                                                               |                                                                                       |

|                                                                                     |                                                                                     |                                                                                      |                                                                                       |
|-------------------------------------------------------------------------------------|-------------------------------------------------------------------------------------|--------------------------------------------------------------------------------------|---------------------------------------------------------------------------------------|
|                                                                                     |                                                                                     |                                                                                      |                                                                                       |
| 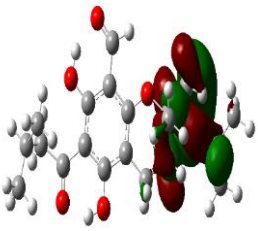   |    |                                                                                      |                                                                                       |
| M5-ε-a-b-m-w-i                                                                      |                                                                                     |                                                                                      |                                                                                       |
|    |    |                                                                                      |                                                                                       |
| M5-ε-a-b-m-w-h                                                                      |                                                                                     |                                                                                      |                                                                                       |
|  |  |                                                                                      |                                                                                       |
| M5-ε-b-w-x-u-e                                                                      |                                                                                     |                                                                                      |                                                                                       |
|  |  |  |  |
| M5-ε-a-m-r-s-e                                                                      |                                                                                     | M5-ζ-a-q-r-j-e                                                                       |                                                                                       |

|                                                                                     |                                                                                     |                                                                                      |                                                                                       |
|-------------------------------------------------------------------------------------|-------------------------------------------------------------------------------------|--------------------------------------------------------------------------------------|---------------------------------------------------------------------------------------|
|                                                                                     |                                                                                     | 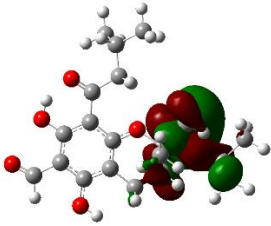   |    |
|                                                                                     |                                                                                     | M5-ζ-a-p-r-e                                                                         |                                                                                       |
|                                                                                     |                                                                                     |    |    |
|                                                                                     |                                                                                     | M5-ζ-a-p-r-k-e                                                                       |                                                                                       |
|                                                                                     |                                                                                     |  |  |
|                                                                                     |                                                                                     | M5-ζ-a-w-k-e                                                                         |                                                                                       |
|  |  |  |  |
| M5-ε-c-n-r-x-e                                                                      |                                                                                     | M5-ζ-c-p-r-v-e                                                                       |                                                                                       |
|  |  |  |  |

|                                                                                     |                                                                                     |                                                                                      |                                                                                       |
|-------------------------------------------------------------------------------------|-------------------------------------------------------------------------------------|--------------------------------------------------------------------------------------|---------------------------------------------------------------------------------------|
| M5-ε-c-n-w-x-e                                                                      |                                                                                     | M5-ζ-c-w-v-e                                                                         |                                                                                       |
| 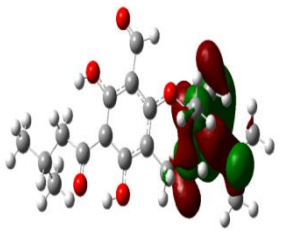   |    |                                                                                      |                                                                                       |
| M5-ε-b-m-w-y-e                                                                      |                                                                                     |                                                                                      |                                                                                       |
|    |    |                                                                                      |                                                                                       |
| M5-ε-c-n-r-x-e                                                                      |                                                                                     |                                                                                      |                                                                                       |
|  |  |  |  |
| M5-ε-c-n-w-x-e                                                                      |                                                                                     | M5-ζ-c-w-z-e                                                                         |                                                                                       |
|  |  |                                                                                      |                                                                                       |
| M5-ε-c-m-r-y-e                                                                      |                                                                                     |                                                                                      |                                                                                       |
|                                                                                     |                                                                                     |                                                                                      |                                                                                       |

|                                                                                   |                                                                                   |                                                                                    |                                                                                     |
|-----------------------------------------------------------------------------------|-----------------------------------------------------------------------------------|------------------------------------------------------------------------------------|-------------------------------------------------------------------------------------|
| 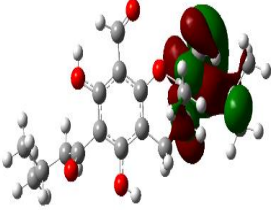 |  |  |  |
| M5-ε-r-s-x-u-e                                                                    |                                                                                   | M5-ζ-r-j-v-e                                                                       |                                                                                     |
|                                                                                   |                                                                                   |  |  |
|                                                                                   |                                                                                   | M5-ζ-r-j-z-e                                                                       |                                                                                     |



f)      **Calculated conformers of euglobal G8 (M6- $\epsilon$ ) and a model molecule with reversed positions of the two acyl groups (M6\*- $\zeta$ )**

| conformers of the M1- $\epsilon$ molecule                                           |                                                                                     | conformers of the M1- $\zeta$ molecule                                               |                                                                                       |
|-------------------------------------------------------------------------------------|-------------------------------------------------------------------------------------|--------------------------------------------------------------------------------------|---------------------------------------------------------------------------------------|
| HOMO                                                                                | LUMO                                                                                | HOMO                                                                                 | LUMO                                                                                  |
| 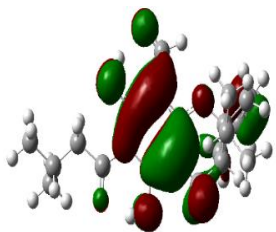   |    |    |    |
| M6- $\epsilon$ -a-b-m-w-e                                                           |                                                                                     | M6*- $\zeta$ -a-b-q-w-e                                                              |                                                                                       |
|   |   |                                                                                      |                                                                                       |
| M6- $\epsilon$ -a-b-m-w-d                                                           |                                                                                     |                                                                                      |                                                                                       |
|  |  |  |  |
| M6- $\epsilon$ -a-b-m-w-g                                                           |                                                                                     | M6*- $\zeta$ -a-b-q-w-g                                                              |                                                                                       |
|  |  |  |  |

|                                                                                     |                                                                                     |                                                                                      |                                                                                       |
|-------------------------------------------------------------------------------------|-------------------------------------------------------------------------------------|--------------------------------------------------------------------------------------|---------------------------------------------------------------------------------------|
| M6-ε-a-b-m-w-f                                                                      |                                                                                     | M6*-ζ-a-b-q-w-f                                                                      |                                                                                       |
| 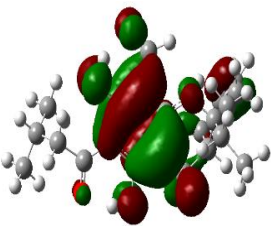   |    |    |    |
| M6-ε-a-b-m-w-h                                                                      |                                                                                     | M6*-ζ-a-b-q-w-h                                                                      |                                                                                       |
|    |    |    |    |
| M6-ε-a-b-m-w-i                                                                      |                                                                                     | M6*-ζ-a-b-q-w-i                                                                      |                                                                                       |
|  |  |  |  |
| M6-ε-c-n-r-x-e                                                                      |                                                                                     | M6*-ζ-c-p-r-v-e                                                                      |                                                                                       |
|  |  |  |  |
| M6-ε-b-m-w-y-e                                                                      |                                                                                     | M6*-ζ-b-q-w-v-u-e                                                                    |                                                                                       |

|                                                                                     |                                                                                     |                                                                                      |                                                                                       |
|-------------------------------------------------------------------------------------|-------------------------------------------------------------------------------------|--------------------------------------------------------------------------------------|---------------------------------------------------------------------------------------|
| 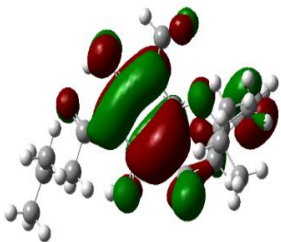   |    |                                                                                      |                                                                                       |
| M6-ε-c-n-w-x-e                                                                      |                                                                                     |                                                                                      |                                                                                       |
|    |    |    |    |
| M6-ε-a-m-r-s-e                                                                      |                                                                                     | M6*-ζ-a-q-r-j-e                                                                      |                                                                                       |
|   |   |                                                                                      |                                                                                       |
| M6-ε-a-m-w-t-e                                                                      |                                                                                     |                                                                                      |                                                                                       |
|  |  |                                                                                      |                                                                                       |
| M6-ε-c-m-r-y-e                                                                      |                                                                                     |                                                                                      |                                                                                       |
|  |  |  |  |

|                                                                                   |                                                                                   |                                                                                    |                                                                                     |
|-----------------------------------------------------------------------------------|-----------------------------------------------------------------------------------|------------------------------------------------------------------------------------|-------------------------------------------------------------------------------------|
| M6-ε-a-m-r-t-e                                                                    |                                                                                   | M6*-ζ-a-p-r-k-e                                                                    |                                                                                     |
|                                                                                   |                                                                                   | 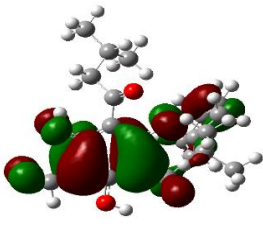 |  |
|                                                                                   |                                                                                   | M6*-ζ-p-r-k-z-u-e                                                                  |                                                                                     |
|  |  |  |  |
| M6-ε-r-t-x-u-e                                                                    |                                                                                   | M6*-ζ-r-j-z-e                                                                      |                                                                                     |



**g) Calculated conformers of euglobal G9 (M7- $\epsilon$ ) and euglobal G10 (M7- $\zeta$ )**

| conformers of the M1- $\epsilon$ molecule                                           |                                                                                     | conformers of the M1- $\zeta$ molecule                                               |                                                                                       |
|-------------------------------------------------------------------------------------|-------------------------------------------------------------------------------------|--------------------------------------------------------------------------------------|---------------------------------------------------------------------------------------|
| HOMO                                                                                | LUMO                                                                                | HOMO                                                                                 | LUMO                                                                                  |
| 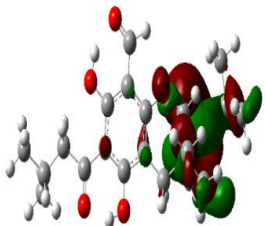   |    |    |    |
| M7- $\epsilon$ -a-b-m-w-e                                                           |                                                                                     | M7- $\zeta$ -a-b-q-w-e                                                               |                                                                                       |
|   |   |   |   |
| M7- $\epsilon$ -a-b-m-w-g                                                           |                                                                                     | M7- $\zeta$ -a-b-q-w-g                                                               |                                                                                       |
|  |  |  |  |
| M7- $\epsilon$ -a-b-m-w-d                                                           |                                                                                     | M7- $\zeta$ -a-b-q-w-d                                                               |                                                                                       |
|  |  |  |  |



|                                                                                     |                                                                                     |                                                                                      |                                                                                       |
|-------------------------------------------------------------------------------------|-------------------------------------------------------------------------------------|--------------------------------------------------------------------------------------|---------------------------------------------------------------------------------------|
| M7-ε-a-b-m-w-f                                                                      |                                                                                     | M7-ζ-a-b-q-w-f                                                                       |                                                                                       |
| 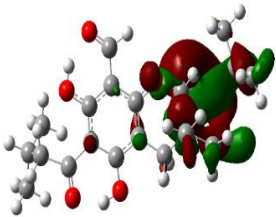   |    |    |    |
| M7-ε-a-b-m-w-i                                                                      |                                                                                     | M7-ζ-a-b-q-w-i                                                                       |                                                                                       |
|    |    |    |    |
| M7-ε-a-b-m-w-h                                                                      |                                                                                     | M7-ζ-a-b-q-w-h                                                                       |                                                                                       |
|  |  |  |  |
| M7-ε-a-m-r-t-e                                                                      |                                                                                     | M7-ζ-a-p-k-r-e                                                                       |                                                                                       |
|                                                                                     |                                                                                     |  |  |
|                                                                                     |                                                                                     | M7-ζ-a-q-r-j-e                                                                       |                                                                                       |

|                                                                                     |                                                                                     |                                                                                      |                                                                                       |
|-------------------------------------------------------------------------------------|-------------------------------------------------------------------------------------|--------------------------------------------------------------------------------------|---------------------------------------------------------------------------------------|
| 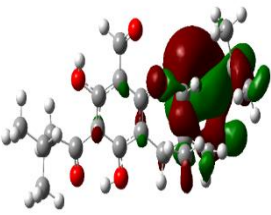   |    |    |    |
| M7-ε-b-w-x-e                                                                        |                                                                                     | M7-ζ-c-p-r-v-e                                                                       |                                                                                       |
|    |    |    |    |
| M7-ε-a-m-w-s-e                                                                      |                                                                                     | M7-ζ-a-w-k-e                                                                         |                                                                                       |
|   |   |   |   |
| M7-ε-c-n-w-x-e                                                                      |                                                                                     | M7-ζ-c-w-z-e                                                                         |                                                                                       |
|                                                                                     |                                                                                     |  |  |
|                                                                                     |                                                                                     | M7-ζ-b-q-w-z-u-e                                                                     |                                                                                       |
|  |  |                                                                                      |                                                                                       |

|                                                                                     |                                                                                     |                                                                                      |                                                                                       |
|-------------------------------------------------------------------------------------|-------------------------------------------------------------------------------------|--------------------------------------------------------------------------------------|---------------------------------------------------------------------------------------|
| M7-ε-b-m-w-y-e                                                                      |                                                                                     |                                                                                      |                                                                                       |
| 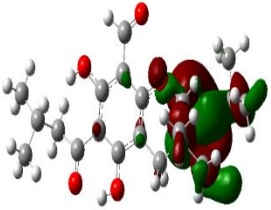   |    |                                                                                      |                                                                                       |
| M7-ε-b-n-w-x-e                                                                      |                                                                                     |                                                                                      |                                                                                       |
|    |    |    |    |
| M7-ε-c-m-r-y-e                                                                      |                                                                                     | M7-ζ-c-p-r-z-e                                                                       |                                                                                       |
|                                                                                     |                                                                                     |  |  |
|                                                                                     |                                                                                     | M7-ζ-c-w-v-e                                                                         |                                                                                       |
|  |  |  |  |
| M7-ε-r-t-x-u-e                                                                      |                                                                                     | M7-ζ-w-k-v-u-e                                                                       |                                                                                       |

**h) Calculated conformers of euglobal G11 (M8- $\epsilon$ ) and a model molecule with reversed positions of the two acyl groups (M8\*- $\zeta$ )**

| conformers of the M1- $\epsilon$ molecule                                           |                                                                                     | conformers of the M1- $\zeta$ molecule                                               |                                                                                       |
|-------------------------------------------------------------------------------------|-------------------------------------------------------------------------------------|--------------------------------------------------------------------------------------|---------------------------------------------------------------------------------------|
| HOMO                                                                                | LUMO                                                                                | HOMO                                                                                 | LUMO                                                                                  |
| 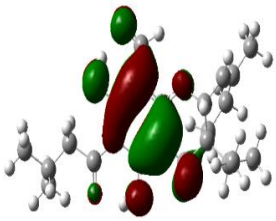   |    |    |    |
| M8- $\epsilon$ -a-b-m-w-e                                                           |                                                                                     | M8*- $\zeta$ -a-b-q-w-e                                                              |                                                                                       |
|  |  |  |  |
| M8- $\epsilon$ -a-b-m-w-d                                                           |                                                                                     | M8*- $\zeta$ -a-b-q-w-d                                                              |                                                                                       |
|  |  |  |  |
| M8- $\epsilon$ -a-b-m-w-g                                                           |                                                                                     | M8*- $\zeta$ -a-b-q-w-g                                                              |                                                                                       |



|                                                                                     |                                                                                     |                                                                                      |                                                                                       |
|-------------------------------------------------------------------------------------|-------------------------------------------------------------------------------------|--------------------------------------------------------------------------------------|---------------------------------------------------------------------------------------|
| 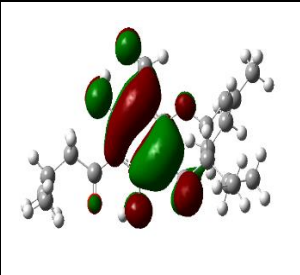   |    |    |    |
| M8-ε-a-b-m-w-f                                                                      |                                                                                     | M8*-ζ-a-b-q-w-f                                                                      |                                                                                       |
|    |    |    |    |
| M8-ε-a-b-m-w-i                                                                      |                                                                                     | M8*-ζ-a-b-q-w-i                                                                      |                                                                                       |
|   |   |   |   |
| M8-ε-a-b-m-w-h                                                                      |                                                                                     | M8*-ζ-a-b-q-w-h                                                                      |                                                                                       |
|  |  |  |  |
| M8-ε-a-m-r-t-e                                                                      |                                                                                     | M8*-ζ-a-q-r-e                                                                        |                                                                                       |
|  |  |  |  |



| M8-ε-a-m-r-s-e                                                                      |                                                                                     | M8*-ζ-a-p-r-k-e |  |
|-------------------------------------------------------------------------------------|-------------------------------------------------------------------------------------|-----------------|--|
| 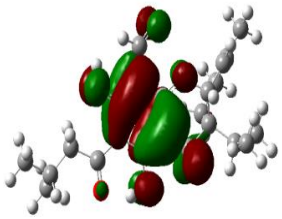   |    |                 |  |
| M8-ε-b-w-x-u-e                                                                      |                                                                                     |                 |  |
|    |    |                 |  |
| M8-ε-c-n-r-x-e                                                                      |                                                                                     |                 |  |
|  |  |                 |  |
| M8-ε-a-m-w-t-e                                                                      |                                                                                     |                 |  |
|  |  |                 |  |
| M8-ε-b-m-w-y-e                                                                      |                                                                                     |                 |  |

|                                                                                     |                                                                                     |                                                                                      |                                                                                       |
|-------------------------------------------------------------------------------------|-------------------------------------------------------------------------------------|--------------------------------------------------------------------------------------|---------------------------------------------------------------------------------------|
| 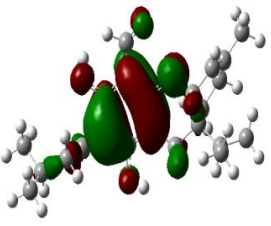   |    |                                                                                      |                                                                                       |
| M8-ε-c-m-r-y-e                                                                      |                                                                                     |                                                                                      |                                                                                       |
|    |    |                                                                                      |                                                                                       |
| M8-ε-b-n-w-x-e                                                                      |                                                                                     |                                                                                      |                                                                                       |
|   |   |   |   |
| M8-ε-c-n-w-x-e                                                                      |                                                                                     | M8*-ζ-c-w-z-e                                                                        |                                                                                       |
|  |  |                                                                                      |                                                                                       |
| M8-ε-c-m-w-y-e                                                                      |                                                                                     |                                                                                      |                                                                                       |
|  |  |  |  |

| M8-ε-r-t-x-u-e                                                                    |                                                                                   | M8*-ζ-p-r-k-z-u-e |  |
|-----------------------------------------------------------------------------------|-----------------------------------------------------------------------------------|-------------------|--|
| 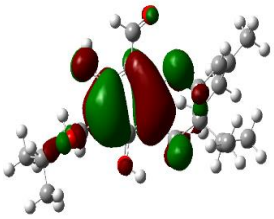 |  |                   |  |
| M8-ε-r-s-x-u-e                                                                    |                                                                                   |                   |  |

- i) **Calculated conformers of a model molecule (M9\*- $\epsilon$ ) with reversed positions of the two acyl groups with respect to euglobal G12 and euglobal G12 (M9- $\zeta$ )**

| conformers of the M1- $\epsilon$ molecule                                           |                                                                                     | conformers of the M1- $\zeta$ molecule                                               |                                                                                       |
|-------------------------------------------------------------------------------------|-------------------------------------------------------------------------------------|--------------------------------------------------------------------------------------|---------------------------------------------------------------------------------------|
| HOMO                                                                                | LUMO                                                                                | HOMO                                                                                 | LUMO                                                                                  |
| 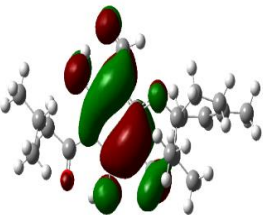   |    |    |    |
| M9*- $\epsilon$ -a-b-m-w-e                                                          |                                                                                     | M9- $\zeta$ -a-b-q-w-e                                                               |                                                                                       |
|   |   |   |   |
| M9*- $\epsilon$ -a-b-m-w-g                                                          |                                                                                     | M9- $\zeta$ -a-b-q-w-g                                                               |                                                                                       |
|  |  |  |  |
| M9*- $\epsilon$ -a-b-m-w-d                                                          |                                                                                     | M9- $\zeta$ -a-b-q-w-d                                                               |                                                                                       |
|  |  |  |  |

|                                                                                     |                                                                                     |                                                                                      |                                                                                       |
|-------------------------------------------------------------------------------------|-------------------------------------------------------------------------------------|--------------------------------------------------------------------------------------|---------------------------------------------------------------------------------------|
| M9*-ε-a-b-m-w-f                                                                     |                                                                                     | M9-ζ-a-b-q-w-f                                                                       |                                                                                       |
| 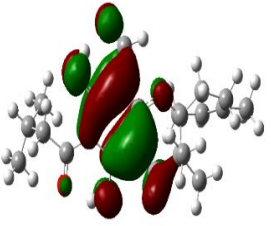   |    |                                                                                      |                                                                                       |
| M9*-ε-a-b-m-w-h                                                                     |                                                                                     |                                                                                      |                                                                                       |
|    |    |                                                                                      |                                                                                       |
| M9*-ε-a-b-m-w-i                                                                     |                                                                                     |                                                                                      |                                                                                       |
|  |  |  |  |
| M9*-ε-a-m-r-s-e                                                                     |                                                                                     | M9-ζ-a-p-r-k-e                                                                       |                                                                                       |
|                                                                                     |                                                                                     |  |  |
|                                                                                     |                                                                                     | M9-ζ-a-q-r-e                                                                         |                                                                                       |



|                                                                                     |                                                                                     |                                                                                      |                                                                                       |
|-------------------------------------------------------------------------------------|-------------------------------------------------------------------------------------|--------------------------------------------------------------------------------------|---------------------------------------------------------------------------------------|
|                                                                                     |                                                                                     | 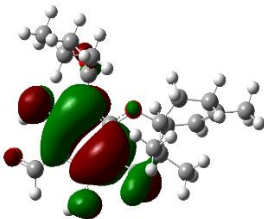   |    |
|                                                                                     |                                                                                     | M9-ζ-a-w-k-e                                                                         |                                                                                       |
|    |    |    |    |
| M9*-ε-c-n-r-x-e                                                                     |                                                                                     | M9-ζ-c-p-r-z-e                                                                       |                                                                                       |
|   |   |   |   |
| M9*-ε-b-w-x-u-e                                                                     |                                                                                     | M9-ζ-b-q-w-v-u-e                                                                     |                                                                                       |
|  |  |  |  |
| M9*-ε-b-n-w-x-e                                                                     |                                                                                     | M9-ζ-b-w-v-e                                                                         |                                                                                       |
|  |  |  |  |

|                                                                                     |                                                                                     |                                                                                      |                                                                                       |
|-------------------------------------------------------------------------------------|-------------------------------------------------------------------------------------|--------------------------------------------------------------------------------------|---------------------------------------------------------------------------------------|
| M9*-ε-c-n-w-x-e                                                                     |                                                                                     | M9-ζ-c-w-z-e                                                                         |                                                                                       |
| 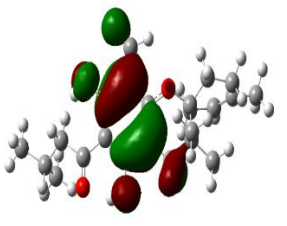   |    |                                                                                      |                                                                                       |
| M9*-ε-b-m-w-y-e                                                                     |                                                                                     |                                                                                      |                                                                                       |
|    |    |    |    |
| M9*-ε-c-m-r-y-e                                                                     |                                                                                     | M9-ζ-c-p-r-v-e                                                                       |                                                                                       |
|  |  |  |  |
| M9*-ε-c-m-w-e                                                                       |                                                                                     | M9-ζ-c-w-v-e                                                                         |                                                                                       |
|  |  |  |  |
| M9*-ε-r-t-x-u-e                                                                     |                                                                                     | M9-ζ-r-j-v-e                                                                         |                                                                                       |

|  |  |                                                                                    |                                                                                     |
|--|--|------------------------------------------------------------------------------------|-------------------------------------------------------------------------------------|
|  |  | 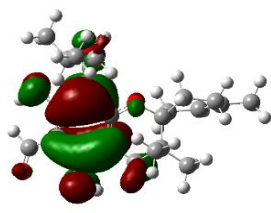 |  |
|  |  | M9-ζ-r-j-z-e                                                                       |                                                                                     |

j) **Calculated conformers of euglobal VII (M10- $\epsilon$ ) and a model molecule with reversed positions of the two acyl groups (M10\*- $\zeta$ )**

| conformers of the M1- $\epsilon$ molecule                                           |                                                                                     | conformers of the M1- $\zeta$ molecule                                               |                                                                                       |
|-------------------------------------------------------------------------------------|-------------------------------------------------------------------------------------|--------------------------------------------------------------------------------------|---------------------------------------------------------------------------------------|
| HOMO                                                                                | LUMO                                                                                | HOMO                                                                                 | LUMO                                                                                  |
| 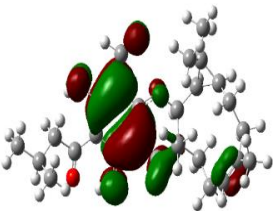   |    |    |    |
| M10- $\epsilon$ -a-b-m-w-e                                                          |                                                                                     | M10*- $\zeta$ -a-b-q-w-e                                                             |                                                                                       |
|   |   |   |   |
| M10- $\epsilon$ -a-b-m-w-d                                                          |                                                                                     | M10*- $\zeta$ -a-b-q-w-d                                                             |                                                                                       |
|  |  |  |  |
| M10- $\epsilon$ -a-b-m-w-g                                                          |                                                                                     | M10*- $\zeta$ -a-b-q-w-g                                                             |                                                                                       |
|  |  |  |  |

|                                                                                     |                                                                                     |                                                                                      |                                                                                       |
|-------------------------------------------------------------------------------------|-------------------------------------------------------------------------------------|--------------------------------------------------------------------------------------|---------------------------------------------------------------------------------------|
| M10-ε-a-b-m-w-f                                                                     |                                                                                     | M10*-ζ-a-b-q-w-f                                                                     |                                                                                       |
| 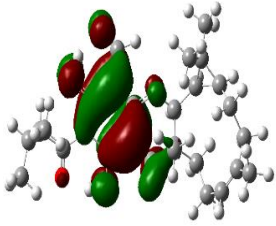   |    |                                                                                      |                                                                                       |
| M10-ε-a-b-m-w-i                                                                     |                                                                                     |                                                                                      |                                                                                       |
|    |    |                                                                                      |                                                                                       |
| M10-ε-a-b-m-w-h                                                                     |                                                                                     |                                                                                      |                                                                                       |
|  |  |  |  |
| M10-ε-c-n-r-x-e                                                                     |                                                                                     | M10*-ζ-c-p-r-z-e                                                                     |                                                                                       |
|  |  |  |  |
| M10-ε-b-w-x-e                                                                       |                                                                                     | M10*-ζ-b-q-w-z-u-e                                                                   |                                                                                       |



|                                                                                    |                                                                                    |                                                                                     |                                                                                      |
|------------------------------------------------------------------------------------|------------------------------------------------------------------------------------|-------------------------------------------------------------------------------------|--------------------------------------------------------------------------------------|
| 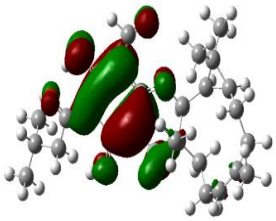  |   |   |   |
| M10-ε-c-n-w-x-e                                                                    |                                                                                    | M10*-ζ-a-p-r-e                                                                      |                                                                                      |
|   |   |   |   |
| M10-ε-b-n-w-x-e                                                                    |                                                                                    | M10*-ζ-a-q-r-e                                                                      |                                                                                      |
|  |  |  |  |
| M10-ε-r-s-x-u-e                                                                    |                                                                                    | M10*-ζ-w-z-k-u-e                                                                    |                                                                                      |
